# Supplementary material
Source: Springer Nature journal article supplement (https://www.springermedizin.de/resource/supplementary/12876_2012_867_MOESM1_ESM.pdf/9437598)

**A**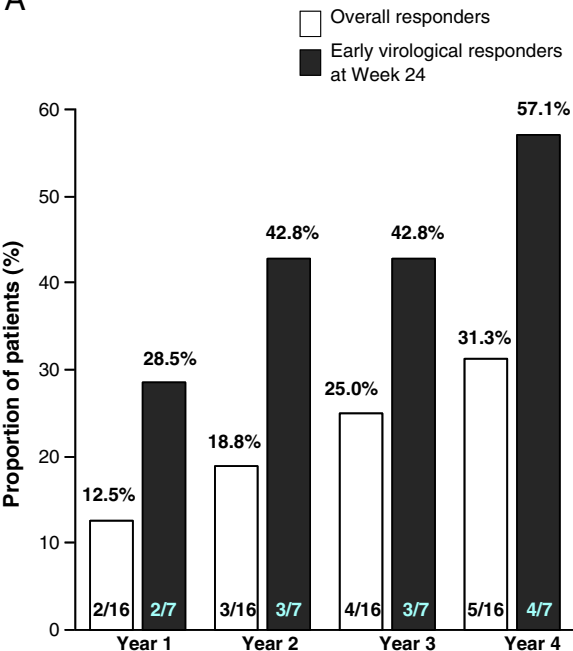**B**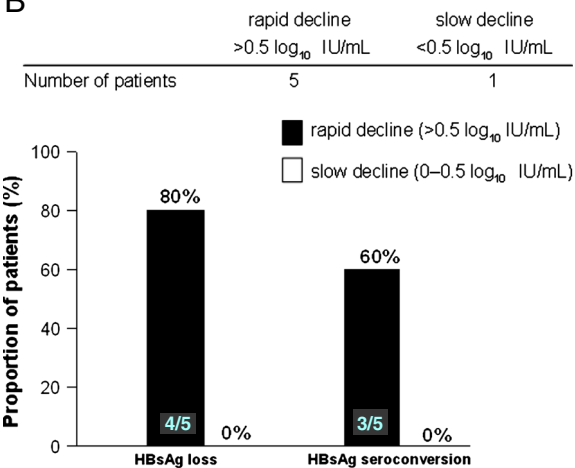

Supplement: MOESM1 [file 9437598]
